# Supplementary material
Source: PubMed Central journal article supplement (PMC7148133)
Supplement: JB.00034-20-s0001.pdf [file JB.00034-20-s0001.pdf]

**Supplementary Figure 1. Localization of chlamydial MreB\_GFPsw proteins in *C. trachomatis*.** HeLa cells were infected with *C. trachomatis* transformants containing aTc-inducible vectors encoding MreB\_GFPsw proteins. At 12 hpi, expression of the GFP sandwich fusions was induced with 10 nM aTc, and the samples were fixed (3.2% Formaldehyde, 0.022% Glutaraldehyde in 1X PBS) at 16 hpi for 2 min and permeabilized with 90% methanol. The samples were stained for major outer membrane protein (MOMP; red) and GFP (green). Images were acquired on a Zeiss LSM 800 confocal microscope. Scale bar = 1  $\mu$ m

**Supplementary Figure 2. Protein sequence alignment of the N-terminus of MreB from diverse *Chlamydia* phylum members.** The extended N-terminus of chlamydial MreB is conserved across *Chlamydia*. (A) The alignment was performed with Clustal Omega (<https://www.ebi.ac.uk/Tools/msa/clustalo/>) and represented with ESPript 3.0 (<http://esprict.ibcp.fr>). (B) The AMPHIPASEEK prediction of amphipathicity for the *Waddlia* MreB ortholog. The blue and red residues represent the extended N-terminus and predicted amphipathic helix, respectively.

**Supplementary Figure 3. Test of complementation of chlamydial MreB in *E. coli* and interaction between chlamydial and *E. coli* MreBs by BACTH.** An *E. coli mreB*-deficient mutant (P2733) strain was transformed with an empty arabinose-inducible vector (A) or vectors encoding *E. coli* MreB (B), chlamydial MreB (C), or truncated chlamydial MreB lacking the extended N-terminal region (D). Stationary phase cultures were diluted to 1:50 in LB media containing 50  $\mu$ g/mL spectinomycin, 25  $\mu$ g/mL tetracycline, and 34  $\mu$ g/mL chloramphenicol and cultured at 37°C with 225 rpm shaking for 2 h. The cells were then induced or not with 0.01% (w/v) arabinose. After induction, 4  $\mu$ L of each culture at 2 h and 6 h were spotted under a 1% LB agar pad and covered with a coverslip. Images were acquired on a Zeiss Imager.Z2 equipped with an Apotome2 using a 100X objective. The arrows indicate the cells

complemented by the induction of *E. coli* MreB. Scale bar = 2  $\mu$ m. (E) BACTH assays were carried out to test interactions between chlamydial MreB and *E. coli* MreB. DHT1 *E. coli* were co-transformed with plasmids encoding the indicated fusion proteins and plated on M63 minimal medium containing 50  $\mu$ g/mL ampicillin, 25  $\mu$ g/mL kanamycin, 0.5 mM IPTG, 40  $\mu$ g/mL X-gal, 0.04% casamino acid, and 0.2% maltose. The plates were incubated at 30°C for 5-7 days. A positive control is the interaction between T25-zip and T18-zip. A negative control is the lack of interaction between T25 and T18-chlamydial MreB and T18-*E. coli* MreB. These tests were performed a minimum of two times. (F) Western blotting was performed to test the expression of chlamydial MreB in strains used in the complementation assay depicted in (C&D). Whole cell lysates from cultures tested in the complementation assay were separated by SDS-PAGE and transferred to a PVDF membrane. The chlamydial MreB was detected with rabbit anti-MreB primary antibody and IRDye goat anti-rabbit 800CW (LI-COR, Lincoln, NE).

**Supplementary Figure 4. Localization of chlamydial N-terminal MreB-GFP fusion proteins in an *E. coli*  $\Delta$ mreB mutant strain (P2733).** The *E. coli*  $\Delta$ mreB mutant (P2733) was transformed with the arabinose-inducible vectors encoding GFP fused with diverse N-terminal regions of chlamydial MreB. Samples were prepared as described in the legend to Figure 4 with the membrane labeled with FM4-64. Images were acquired on a Zeiss Imager.Z2 equipped with an Apotome2 using a 100X objective. Scale bar = 2  $\mu$ m.

**Supplementary Figure 5. Localization of the N-terminus of *C. suis* MreB-GFP fusion peptides in *C. trachomatis* and *E. coli*.** (A) The predicted amphipathicity of the N-terminus of *C. suis* (Cs) MreB. (B) A helical wheel prediction is shown. (C) The CsMreB<sub>1-23aa</sub>-GFP peptide is localized in the cytosol in *E. coli*. In contrast, the CsMreB<sub>1-28aa</sub>-GFP peptide is localized at the membrane at the poles of *E. coli*. These patterns are the same as those of *C. trachomatis* (see Figure 3). (D, E) HeLa cells were infected with *C. trachomatis* transformants

containing aTc-inducible vectors encoding CsMreB<sub>1-23aa</sub>-GFP or CsMreB<sub>1-28aa</sub>-GFP fusion proteins. Expression of these fusion proteins was induced at 6 hpi or 16 hpi with 10 nM aTc. At 10.5 hpi or 20 hpi, the samples were fixed (3.2% Formaldehyde, 0.022% Glutaraldehyde in 1X PBS) for 2 min and permeabilized with 90% methanol (MeOH) for 1 min. These samples were stained for major outer membrane protein (MOMP; red) with GFP imaged in green. The arrowheads indicate the CsMreB<sub>1-23aa</sub>-GFP localized at the membrane (see also Figure 4). Images were acquired on a Zeiss LSM 800 confocal microscope with 63X objective. Scale bar = 0.5  $\mu\text{m}$  (10.5 hpi) or 1  $\mu\text{m}$  (20 hpi).

**Supplementary Figure 6. The localization of various truncated chlamydial MreBs in *C. trachomatis* L2.** (A) Representation of the various truncated chlamydial MreBs tested. The blue and red residues represent the extended N-terminus and predicted amphipathic helix, respectively. (B) *C. trachomatis* serovar L2 transformants containing aTc-inducible vectors encoding the truncated MreBs were used to infect HeLa cells. At 16 hpi, expression of the MreB<sub>6xH</sub> constructs was induced with 10 nM aTc, and these samples were fixed (3.2% Formaldehyde, 0.022% Glutaraldehyde in 1X DPBS) at 20 hpi for 2 min and permeabilized with 90% methanol. The samples were stained for major outer membrane protein (MOMP; red) and six histidine tag (green). Images were acquired on a Zeiss Imager.Z2 equipped with an Apotome2 using a 100X objective. The white box represents the cells which are zoomed in at the upper right. Scale bar = 2  $\mu\text{m}$ .

**Supplementary Table 1. List of Plasmids, Strains, and Primers Used in the Study**

| Construct Plasmid                    | Relevant genotype                                                            | Ori   | Source of Reference |
|--------------------------------------|------------------------------------------------------------------------------|-------|---------------------|
| pASK-GFP-mKate-L2 (pTLR2)            | <i>bla</i> P <sub>tet</sub> :: <i>gfp</i>                                    | ColE1 | (1)                 |
| pTLR2- <i>mreB</i> <sub>6xH</sub>    | <i>bla</i> P <sub>tet</sub> :: <i>Ctr_mreB</i> <sub>6xH</sub>                | ColE1 | This study          |
| pTLR2- <i>mreB</i> <sub>67_6xH</sub> | <i>bla</i> P <sub>tet</sub> :: $\Delta$ N66nt <i>Ctr_mreB</i> <sub>6xH</sub> | ColE1 | This study          |

|                                                |                                                                                            |       |            |
|------------------------------------------------|--------------------------------------------------------------------------------------------|-------|------------|
| pTLR2- <i>mreB</i> 85 6xH                      | <i>bla</i> P <sub>tet</sub> ::ΔN84nt <i>Ctr_mreB</i> _6xH                                  | ColE1 | This study |
| pTLR2- <i>mreB</i> 97 6xH                      | <i>bla</i> P <sub>tet</sub> ::ΔN96nt <i>Ctr_mreB</i> _6xH                                  | ColE1 | This study |
| pTLR2- <i>mreB</i> - <i>gfp</i> sw             | <i>bla</i> P <sub>tet</sub> :: <i>Ctr_mreB-gfp_sw</i>                                      | ColE1 | This study |
| pTLR2- <i>mreB</i> _67- <i>gfp</i> sw          | <i>bla</i> P <sub>tet</sub> ::ΔN66nt <i>Ctr_mreB-gfp_sw</i>                                | ColE1 | This study |
| pTLR2- <i>mreB</i> _85- <i>gfp</i> sw          | <i>bla</i> P <sub>tet</sub> ::ΔN84nt <i>Ctr_mreB-gfp_sw</i>                                | ColE1 | This study |
| pTLR2- <i>mreB</i> _97- <i>gfp</i> sw          | <i>bla</i> P <sub>tet</sub> ::ΔN96nt <i>Ctr_mreB-gfp_sw</i>                                | ColE1 | This study |
| pBAD33                                         | <i>cat</i> P <sub>ara</sub>                                                                | p15A  | (2)        |
| pBAD33- <i>Ec_mreB</i>                         | <i>cat</i> P <sub>ara</sub> :: <i>Ec_mreB</i>                                              | p15A  | This study |
| pBAD33- <i>mreB</i>                            | <i>cat</i> P <sub>ara</sub> :: <i>Ctr_mreB</i>                                             | p15A  | This study |
| pBAD33- <i>mreB</i> 67                         | <i>cat</i> P <sub>ara</sub> ::ΔN66nt <i>Ctr_mreB</i>                                       | p15A  | This study |
| pBAD33G                                        | <i>cat</i> P <sub>ara</sub> :: <i>gfp</i>                                                  | p15A  | This study |
| pBAD33G- <i>mreB</i> 1-96nt                    | <i>cat</i> P <sub>ara</sub> :: <i>Ctr_mreB</i> 1-96nt- <i>gfp</i>                          | p15A  | This study |
| pBAD33G- <i>mreB</i> 1-84nt                    | <i>cat</i> P <sub>ara</sub> :: <i>Ctr_mreB</i> 1-84nt- <i>gfp</i>                          | p15A  | This study |
| pBAD33G- <i>mreB</i> 1-69nt                    | <i>cat</i> P <sub>ara</sub> :: <i>Ctr_mreB</i> 1-69nt- <i>gfp</i>                          | p15A  | This study |
| pBAD33G- <i>mreB</i> 1-69nt duplicate          | <i>cat</i> P <sub>ara</sub> :: <i>Ctr_mreB</i> 1-69nt <i>Ctr_mreB</i> 1-69nt - <i>gfp</i>  | p15A  | This study |
| pBAD33G- <i>mreB</i> 67-96nt                   | <i>cat</i> P <sub>ara</sub> :: <i>Ctr_mreB</i> 67-96nt- <i>gfp</i>                         | p15A  | This study |
| pBAD33G- <i>mreB</i> 67-96nt duplicate         | <i>cat</i> P <sub>ara</sub> :: <i>Ctr_mreB</i> 67-96nt <i>Ctr_mreB</i> 67-96nt- <i>gfp</i> | p15A  | This study |
| pBAD33G- <i>Ec_mreB</i>                        | <i>cat</i> P <sub>ara</sub> :: <i>Ec_mreB-gfp</i>                                          | p15A  | This study |
| pBAD33G- <i>Ec_mreB</i> 22                     | <i>cat</i> P <sub>ara</sub> ::ΔN21nt <i>Ec_mreB-gfp</i>                                    | p15A  | This study |
| pBAD33G- <i>mreB</i> 1-84nt- <i>Ec_mreB</i> 22 | <i>cat</i> P <sub>ara</sub> :: <i>Ctr_mreB</i> 1-84nt-ΔN21nt <i>Ec_mreB-gfp</i>            | p15A  | This study |
| pBAD33G- <i>mreB</i> 1-69nt- <i>Ec_mreB</i> 22 | <i>cat</i> P <sub>ara</sub> :: <i>Ctr_mreB</i> 1-69nt-ΔN21nt <i>Ec_mreB-gfp</i>            | p15A  | This study |
| pBAD33G-L7K, L22R <i>mreB</i> 1-69nt           | <i>cat</i> P <sub>ara</sub> ::L7K, L22R <i>Ctr_mreB</i> 1-69nt- <i>gfp</i>                 | p15A  | This study |
| pBAD33G-L7K, L22R, F25K <i>mreB</i> 1-69nt     | <i>cat</i> P <sub>ara</sub> ::L7K, L22R, F25K <i>Ctr_mreB</i> 1-84nt- <i>gfp</i>           | p15A  | This study |
| pBAD33G- <i>CsmreB</i> 1-69nt                  | <i>cat</i> P <sub>ara</sub> :: <i>C. suis_mreB</i> 1-69nt- <i>gfp</i>                      | p15A  | This study |
| pBAD33G- <i>CsmreB</i> 1-84nt                  | <i>cat</i> P <sub>ara</sub> :: <i>C. suis_mreB</i> 1-84nt- <i>gfp</i>                      | p15A  | This study |
| pBAD33G-L7K,                                   | <i>cat</i> P <sub>ara</sub> ::L7K, L22R <i>Ctr_mreB</i> 1-69nt- ΔN21nt                     | p15A  | This study |

|                                                                  |                                                                                                           |        |            |
|------------------------------------------------------------------|-----------------------------------------------------------------------------------------------------------|--------|------------|
| L22R <i>mreB</i> <sub>1-69nt</sub> - <i>EcmreB</i> 22            | <i>Ec_mreB-gfp</i>                                                                                        |        |            |
| pBAD33G-L7K, L22R, F25K <i>mreB</i> <sub>1-84nt</sub>            | <i>cat</i> <i>Para</i> ::L7K, L22R, F25K <i>Ctr_mreB</i> <sub>1-84nt</sub> - ΔN21nt<br><i>Ec_mreB-gfp</i> | p15A   | This study |
| pBOMB4-Tet                                                       | <i>bla</i> <i>P</i> <sub>tet</sub> :: <i>mCherry</i> <i>P</i> <sub>Nmen</sub> :: <i>gfp</i>               | pUC19  | (3)        |
| pBOMB-G-Tet                                                      | <i>bla</i> <i>P</i> <sub>tet</sub> :: <i>mCherry</i>                                                      | pUC19  | This study |
| pBOMB-G-Tet- <i>mreB</i> <sub>1-69nt</sub> - <i>gfp</i>          | <i>bla</i> <i>P</i> <sub>tet</sub> :: <i>Ctr_mreB</i> <sub>1-69nt</sub> - <i>gfp</i>                      | pUC19  | This study |
| pBOMB-G-Tet- <i>mreB</i> <sub>1-84nt</sub> - <i>gfp</i>          | <i>bla</i> <i>P</i> <sub>tet</sub> :: <i>Ctr_mreB</i> <sub>1-84nt</sub> - <i>gfp</i>                      | pUC19  | This study |
| pBOMB-G-Tet-L7K, L22R <i>mreB</i> <sub>1-69nt</sub> - <i>gfp</i> | <i>bla</i> <i>P</i> <sub>tet</sub> ::L7K, L22R <i>Ctr_mreB</i> <sub>1-69nt</sub> - <i>gfp</i>             | pUC19  | This study |
| pBOMB-G-Tet-L7K, L22R <i>mreB</i> <sub>1-84nt</sub> - <i>gfp</i> | <i>bla</i> <i>P</i> <sub>tet</sub> ::L7K, L22R, F25K <i>Ctr_mreB</i> <sub>1-84nt</sub> - <i>gfp</i>       | pUC19  | This study |
| pBOMB-G-Tet- <i>CsmreB</i> <sub>1-69nt</sub> - <i>gfp</i>        | <i>bla</i> <i>P</i> <sub>tet</sub> :: <i>C. suis_mreB</i> <sub>1-69nt</sub> - <i>gfp</i>                  | pUC19  | This study |
| pBOMB-G-Tet- <i>CsmreB</i> <sub>1-84nt</sub> - <i>gfp</i>        | <i>bla</i> <i>P</i> <sub>tet</sub> :: <i>C. suis_mreB</i> <sub>1-84nt</sub> - <i>gfp</i>                  | pUC19  | This study |
| pKT25                                                            | <i>aph</i> <i>P</i> <sub>lac</sub> :: <i>t25</i>                                                          | p15A   | (4)        |
| pKT25- <i>mreB</i>                                               | <i>aph</i> <i>P</i> <sub>lac</sub> :: <i>t25</i> - <i>Ctr_mreB</i>                                        | p15A   | (5)        |
| pKT25- <i>mreB</i> 67                                            | <i>aph</i> <i>P</i> <sub>lac</sub> :: <i>t25</i> -ΔN66nt <i>Ctr_mreB</i>                                  | p15A   | This study |
| pKT25- <i>mreB</i> 85                                            | <i>aph</i> <i>P</i> <sub>lac</sub> :: <i>t25</i> -ΔN84nt <i>Ctr_mreB</i>                                  | p15A   | This study |
| pKT25- <i>mreB</i> 97                                            | <i>aph</i> <i>P</i> <sub>lac</sub> :: <i>t25</i> -ΔN96nt <i>Ctr_mreB</i>                                  | p15A   | This study |
| pKT25- <i>Ec_mreB</i>                                            | <i>aph</i> <i>P</i> <sub>lac</sub> :: <i>t25</i> - <i>Ec_mreB</i> <sub>SW</sub>                           | p15A   | (6)        |
| pKT25- <i>zip</i>                                                | <i>aph</i> <i>P</i> <sub>lac</sub> :: <i>t25</i> - <i>zip</i>                                             | p15A   | (4)        |
| pUT18C                                                           | <i>bla</i> <i>P</i> <sub>lac</sub> :: <i>t18</i>                                                          | ColE1  | (4)        |
| pUT18C- <i>mreB</i>                                              | <i>bla</i> <i>P</i> <sub>lac</sub> :: <i>t18</i> - <i>Ctr_mreB</i>                                        | ColE1  | (5)        |
| pUT18C- <i>mreB</i> 67                                           | <i>bla</i> <i>P</i> <sub>lac</sub> :: <i>t18</i> -ΔN66nt <i>Ctr_mreB</i>                                  | ColE1  | This study |
| pUT18C- <i>mreB</i> 85                                           | <i>bla</i> <i>P</i> <sub>lac</sub> :: <i>t18</i> -ΔN84nt <i>Ctr_mreB</i>                                  | ColE1  | This study |
| pUT18C- <i>mreB</i> 97                                           | <i>bla</i> <i>P</i> <sub>lac</sub> :: <i>t18</i> -ΔN96nt <i>Ctr_mreB</i>                                  | ColE1  | This study |
| pUT18C- <i>rodZ</i>                                              | <i>bla</i> <i>P</i> <sub>lac</sub> :: <i>t18</i> - <i>Ctr_rodZ</i>                                        | ColE1  | (7)        |
| pUT18C- <i>ftsK</i>                                              | <i>bla</i> <i>P</i> <sub>lac</sub> :: <i>t18</i> - <i>Ctr_ftsK</i>                                        | ColE1  | (5)        |
| pUT18C- <i>ftsKN</i>                                             | <i>bla</i> <i>P</i> <sub>lac</sub> :: <i>t18</i> -N-terminus of <i>Ctr_ftsK</i>                           | ColE1  | (5)        |
| pUT18C- <i>Ec_mreB</i>                                           | <i>bla lacI</i> <sup>q</sup> <i>P</i> <sub>lac</sub> :: <i>t18</i> - <i>Ec_mreB</i> <sub>SW</sub>         | ColE1  | (6)        |
| pUT18C- <i>zip</i>                                               | <i>bla</i> <i>P</i> <sub>lac</sub> :: <i>t18</i> - <i>zip</i>                                             | ColE1  | (4)        |
| pFB112                                                           | <i>tet sdiA</i>                                                                                           | ColE1  | (8)        |
| pFB124                                                           | <i>aadA</i> <i>ci857</i> (Ts) <i>P</i> <sub>λR</sub> :: <i>mreC_mreD</i> -LE                              | pSC101 | (8)        |

| <i>E. coli</i> Strain | Relevant genotype                                                                                                                                      | Source of Reference |
|-----------------------|--------------------------------------------------------------------------------------------------------------------------------------------------------|---------------------|
| MG1655                | F <sup>-</sup> , lambda <sup>-</sup> , <i>rph-1</i>                                                                                                    | Lab strain          |
| FB17                  | <i>dadR trpE trpA tna mreBCD</i> <> <i>frt</i>                                                                                                         | (8)                 |
| DHT1                  | F <sup>-</sup> <i>glnV44</i> (AS) <i>recA1 endA1 gyrA96</i> (Nal <sup>R</sup> ) <i>thi-1 hsdR17 spoT1 rfbD1 cya-854 ilv-691 ::Tn10</i> ( <i>TetR</i> ) | (9)                 |
| P2733                 | FB17 pFB112 pFB124                                                                                                                                     | (8)                 |

| Primer name                   | Sequence                                                                                            | Features                                                                                  | Usage                                                                                  |
|-------------------------------|-----------------------------------------------------------------------------------------------------|-------------------------------------------------------------------------------------------|----------------------------------------------------------------------------------------|
| mreB<br>5'/pTLR2/LIC_F        | ttgtttaactttaagaaggagata<br>ATGAGCCCATACCGCAGC                                                      | lower case for<br>plasmid overlap<br>construction                                         | for<br>amplification<br>of <i>mreB</i> into<br>pTLR2                                   |
| mreB6XH/pTLR2<br>/R           | ccattttcacttcacaggtaacc<br>ttaatggtgatggtgatggtg<br>TACTAAACTCTCTTTTCGTTTCTTCAAT<br>TG              | lower case for<br>plasmid overlap<br>construction, adds<br>6xH to <i>mreB</i><br>sequence | for<br>amplification<br>of <i>mreB</i> into<br>pTLR2                                   |
| mreB_1_5'/pBAD<br>33/F        | ttcgagctcggtagccggggatcct<br>ttgtttaactttaagaaggagatataca<br>ATGAGCCCATACCGCAGC                     | lower case for<br>plasmid overlap<br>construction, adds<br>Shine-Dalgano<br>(SD) sequence | for<br>amplification<br>of <i>mreB</i> into<br>pBAD33                                  |
| mreB_67_5'/pBA<br>D33/F       | ttcgagctcggtagccggggatcct<br>ttgtttaactttaagaaggagatatacaatg<br>GGTCGTTTCGATCGTGATTTAATTTTT<br>TTTC | lower case for<br>plasmid overlap<br>construction, adds<br>Shine-Dalgano<br>(SD) sequence | for<br>amplification<br>of $\Delta$ N66nt<br><i>mreB</i> into<br>pBAD33                |
| mreB<br>3'/pBAD33/LIC_<br>R   | ctagaggatccccggtagccgagct<br>TCATACTAAACTCTCTTTTCGTTTC                                              | lower case for<br>plasmid overlap<br>construction                                         | for<br>amplification<br>of <i>mreBs</i> into<br>pBAD33                                 |
| EcmreB/pBAD33<br>/F           | gctcggtagccggggatcct<br>ttgtttaactttaagaaggagatataca<br>ATGTTGAAAAAATTTTCGTG                        | lower case for<br>plasmid overlap<br>construction, adds<br>Shine-Dalgano<br>(SD) sequence | for<br>amplification<br>of <i>Ec_mreB</i><br>into pBAD33                               |
| EcmreB/pBAD33<br>/R           | caagttgcatgcctgcagg<br>TTACTCTTCGCTGAACAGG                                                          | lower case for<br>plasmid overlap<br>construction                                         | for<br>amplification<br>of <i>Ec_mreB</i><br>into pBAD33                               |
| mreB/pBAD33G/<br>F            | tgggctagcgaattcgagct<br>ttgtttaactttaagaaggagatataca<br>ATGAGCCCATACCGCAGC                          | lower case for<br>plasmid overlap<br>construction, adds<br>Shine-Dalgano<br>(SD) sequence | for<br>amplification<br>of <i>mreB_1-<br/>96nt</i> into<br>pBAD33G                     |
| mreB1-<br>96nt/pBAD33G/R      | gtcgacttagaggatcccc c<br>AAAAAAATTAATACACGATCGAAAC<br>G                                             | lower case for<br>plasmid overlap<br>construction                                         | for<br>amplification<br>of <i>mreB_1-<br/>96nt</i> into<br>pBAD33G                     |
| Ctr<br>L2/mreB/pBAD/5<br>'    | TATATGGTACCTGATTAAC TTTATAAGG<br>AGGAAAAACATATGAGCCCATACCGC<br>AGCTTATAT                            | Underline for<br>KpnI site                                                                | for<br>amplification<br>of <i>mreB_1-<br/>69nt</i> and 1-<br>84nt into<br>pBAD vectors |
| Ctr<br>L2/mreB_69/pBA<br>D/3' | CGCCCTCTAGAACCCAACGCCTTGTT<br>ATACAGACGGTTAGA                                                       | Underline for<br>XbaI site                                                                | for<br>amplification<br>of <i>mreB_1-<br/>69nt</i> into                                |

|                       |                                                                             |                                                                                |                                                                                            |
|-----------------------|-----------------------------------------------------------------------------|--------------------------------------------------------------------------------|--------------------------------------------------------------------------------------------|
|                       |                                                                             |                                                                                | pBAD vectors                                                                               |
| Ctrl2/mreB_84/pBAD/3' | CGCCCTCTAGATACACGATCGAAACG<br>ACCCAACGCCTTGTATAC                            | Underline for XbaI site                                                        | for amplification of <i>mreB</i> _1-84nt into pBAD vectors                                 |
| mreB_67-84D/pBAD33/F  | gctcggtagccgggacccct<br>ttgtttaactttaagaaggagatataca<br>ATGGGTCGTTTCGATCGTG | lower case for plasmid overlap construction, adds Shine-Dalgarno (SD) sequence | for amplification of <i>mreB</i> _67-84nt-gfp from gBlock                                  |
| GFP/pBAD33/R          | caagcttgcagcctgcagg<br>TTATTTGTATAGTTCATCCATGCCATG                          | lower case for plasmid overlap construction                                    | for amplification of <i>mreB</i> _67-84nt-gfp from gBlock                                  |
| Ec mreB/pBAD/5'       | CCCCCGAGCTCTGATTAACCTTATAAG<br>GAGGAAAAACATATGCTGAAAAAATT<br>TCGTGGCATGT    | Underline for SacI site                                                        | for amplification of <i>Ec_mreB</i> into pBAD33                                            |
| Ec mreB_22/pBAD/5'    | CCCCCGAGCTCTGATTAACCTTATAAG<br>GAGGAAAAACATATGTTCTCCAATGA<br>CTTGTCATTGA    | Underline for SacI site                                                        | for amplification of $\Delta$ N21nt <i>Ec_mreB</i> into pBAD33                             |
| Ec mreB/pBAD33G/3'    | ATAATGTCGACCTCTTCGCTGAACAG<br>GTCGCCGCCGTGCATGTCGATC                        | Underline for Sall site                                                        | for amplification of <i>Ec_mreB</i> into pBAD33G                                           |
| mreB/pBOMB/F          | gatctaagaggagaaaggatctgc<br>ATGAGCCCATACCGCAG                               | lower case for plasmid overlap construction                                    | for amplification of <i>mreB</i> _1-69nt and 1-84nt fused with <i>gfp</i> into pBOMB-G-Tet |
| GFP/pBOMB/R           | ttggaatggtcgaccggtac<br>TTATTTGTATAGTTCATCCATGCCATG                         | lower case for plasmid overlap construction                                    | for amplification of <i>mreB</i> _1-69nt and 1-84nt fused with <i>gfp</i> into pBOMB-G-Tet |
| mreB_4/T25/F          | ctgcagggtcgactctagag<br>AGCCCATACCGCAGCTTATATAAG                            | lower case for plasmid overlap construction                                    | for amplification of <i>mreB</i> into pKT25                                                |
| mreB_67/T25/F         | ctgcagggtcgactctagag<br>GGTCGTTTCGATCGTGATTTAATTTTT<br>TTTC                 | lower case for plasmid overlap construction                                    | for amplification of $\Delta$ N66nt                                                        |

|                           |                                                              |                                             |                                                             |
|---------------------------|--------------------------------------------------------------|---------------------------------------------|-------------------------------------------------------------|
|                           |                                                              |                                             | <i>mreB</i> into pKT25                                      |
| mreB_85/T25/F             | ctgcagggtcgactctagag<br>TTTAATTTTTTTTTCCGGG                  | lower case for plasmid overlap construction | for amplification of $\Delta$ N84nt <i>mreB</i> into pKT25  |
| mreB_97/T25/F             | ctgcagggtcgactctagag<br>TCCGGGAATGTTGGTATC                   | lower case for plasmid overlap construction | for amplification of $\Delta$ N96nt <i>mreB</i> into pKT25  |
| mreB_1101/(pKT25)/R       | tcacgacgttgtaaaacgacggccg<br>TCATACTAAACTCTCTTTTCGTTTC       | lower case for plasmid overlap construction | for amplification of <i>mreBs</i> into pKT25                |
| mreB_4/T18/F              | actgcagggtcgactctagag<br>AGCCCATACCGCAGCTTATATAAG            | lower case for plasmid overlap construction | for amplification of <i>mreB</i> into pUT18C                |
| mreB_67/T18/F             | actgcagggtcgactctagag<br>GGTCGTTTCGATCGTGATTTAATTTTT<br>TTTC | lower case for plasmid overlap construction | for amplification of $\Delta$ N66nt <i>mreB</i> into pUT18C |
| mreB_85/T18/F             | actgcagggtcgactctagag<br>TTTAATTTTTTTTTCCGGG                 | lower case for plasmid overlap construction | for amplification of $\Delta$ N84nt <i>mreB</i> into pUT18C |
| mreB_97/T18/F             | actgcagggtcgactctagag<br>TCCGGGAATGTTGGTATC                  | lower case for plasmid overlap construction | for amplification of $\Delta$ N96nt <i>mreB</i> into pUT18C |
| mreB_1101/(pUT18C)/R      | accatattacttagtataatcgatg<br>TCATACTAAACTCTCTTTTCGTTTC       | lower case for plasmid overlap construction | for amplification of <i>mreBs</i> into pUT18C               |
| Ct009/rodZ/BAC TH/5'BamHI | ATATAGGATCCAGGTAGAGCAAACCA<br>GGGGAATTAC                     | Underline BamHI site                        | for amplification of <i>rodZ</i>                            |
| Ct009/rodZ/BAC TH/3'KpnI  | AGGGTGGTACCTTAGAAAAGGTTGAA<br>TAGATTCCCTAG                   | Underline KpnI site                         | for amplification of <i>rodZ</i>                            |
| Ct739/ftsK/BAC TH/5'XbaI  | ACTAGCTGGTTCTAGATGGAAAAGAA<br>CGGAAGAAA                      | Underline XbaI site                         | for amplification of <i>ct739(Ctr_ftsK)</i>                 |
| Ct739/ftsK/BAC TH/3'KpnI  | CACAGCTAGAGGTACCATTTAATCGTC<br>CTGATTTGA                     | Underline KpnI site                         | for amplification of                                        |



|                           |                                                       |                                                                                    |                                                            |
|---------------------------|-------------------------------------------------------|------------------------------------------------------------------------------------|------------------------------------------------------------|
|                           |                                                       |                                                                                    | <i>ct739(ctr_fts K)</i>                                    |
| Ct739/ftsKN/BA CTH/5'XbaI | ACTAG <u>TCTAGAT</u> GGAAAAGAACGGAAGAAA               | Underline for XbaI site                                                            | for amplification of N-terminus of <i>ct739(ctr_fts K)</i> |
| Ct739/ftsKN/BA CTH/3'KpnI | CTAGAG <u>GTACCAT</u> TTGAGAAATTTTAGGAGA              | Underline for KpnI site                                                            | for amplification of N-terminus of <i>ct739(ctr_fts K)</i> |
| mreB67 5'/pTLR2/LIC_F     | ttgtttaactttaagaaggagata<br>ATGGGTCGTTTCGATCGTG       | lower case for plasmid overlap construction                                        | for amplification of $\Delta$ N66nt <i>mreB</i> into pTLR2 |
| mreB85 5'/pTLR2/LIC_F     | ttgtttaactttaagaaggagata<br>ATGTTTAATTTTTTTTCCGGGAATG | lower case for plasmid overlap construction                                        | for amplification of $\Delta$ N84nt <i>mreB</i> into pTLR2 |
| mreB_97_5'/pTLR2/F        | ttgtttaactttaagaaggagata<br>atgTCCGGGAATGTTGGTATC     | lower case for plasmid overlap construction                                        | for amplification of $\Delta$ N96nt <i>mreB</i> into pTLR2 |
| gfp/pTLR2-mreB/LIC F      | ttatccgtaggtggagtagt<br>AGTAAAGGAGAAGCACTTTTC         | lower case for plasmid overlap construction                                        | for amplification of <i>gfp</i> into pTLR2                 |
| gfp/pTLR2-mreB/LIC R      | cctgatcactactcc<br>GAGTCCGGACTTGTATAGTTC              | lower case for <i>mreB</i> 3' insert DNA overlap construction                      | for amplification of <i>gfp</i> into pTLR2                 |
| mreB 5'/pTLR2/LIC_R2      | ccttactactactcc<br>ACCTAACGGATAAGCAGAACCTATAG         | lower case for <i>gfp</i> insert DNA overlap construction                          | for amplification of N-terminus of <i>mreB</i> into pTLR2  |
| mreB 3'/pTLR2/LIC_F2      | caagtcgggactc <i>ggagtagt</i><br>GATCAGGAATTGGAGATG   | lower case for <i>gfp</i> insert DNA overlap construction, adds link residues, GGS | for amplification of C-terminus of <i>mreB</i> into pTLR2  |
| Ec mreB/BACTH/5' Bam      | CCTTGGGATCCTCTGAAAAAATTCGTGGCATGT                     | Underline for BamHI site                                                           | for amplification of Ec <i>mreB</i>                        |
| Ec mreB/BACTH/3'          | ATATTGAGCTCCTTACTCTTCGCTGAACAGGTCGCC                  | Underline for SacI site                                                            | for amplification                                          |

|                            |                                        |                            |                                           |
|----------------------------|----------------------------------------|----------------------------|-------------------------------------------|
| Sacstp                     |                                        |                            | of Ec <i>mreB</i>                         |
| Ec<br>mreB/BACTH/3'<br>Sac | TATATGAGCTCCCCTCTTCGCTGAACA<br>GGTCGCC | Underline for SacI<br>site | for<br>amplification<br>of Ec <i>mreB</i> |

1. Wickstrum J, Sammons LR, Restivo KN, Hefty PS. 2013. Conditional gene expression in *Chlamydia trachomatis* using the tet system. PLoS One 8:e76743.
2. Guzman LM, Belin D, Carson MJ, Beckwith J. 1995. Tight regulation, modulation, and high-level expression by vectors containing the arabinose PBAD promoter. J Bacteriol 177:4121-30.
3. Bauler LD, Hackstadt T. 2014. Expression and targeting of secreted proteins from *Chlamydia trachomatis*. J Bacteriol 196:1325-34.
4. Karimova G, Ullmann A, Ladant D. 2001. Protein-protein interaction between *Bacillus stearothermophilus* tyrosyl-tRNA synthetase subdomains revealed by a bacterial two-hybrid system. J Mol Microbiol Biotechnol 3:73-82.
5. Ouellette SP, Karimova G, Subtil A, Ladant D. 2012. *Chlamydia* co-opts the rod shape-determining proteins MreB and Pbp2 for cell division. Mol Microbiol 85:164-78.
6. Bendezu FO, Hale CA, Bernhardt TG, and de Boer PA. 2009. RodZ (YfgA) is required for proper assembly of the MreB actin cytoskeleton and cell shape in *E. coli*. EMBO J. 28:193-204.
7. Ouellette SP, Rueden KJ, Gauliard E, Persons L, de Boer PA, Ladant D. 2014. Analysis of MreB interactors in *Chlamydia* reveals a RodZ homolog but fails to detect an interaction with MraY. Front Microbiol 5:279.
8. Bendezu FO, de Boer PA. 2008. Conditional lethality, division defects, membrane involution, and endocytosis in *mre* and *mrd* shape mutants of *Escherichia coli*. J Bacteriol 190:1792-811.
9. Dautin N, Karimova G, Ullmann A, Ladant D. 2000. Sensitive genetic screen for protease activity based on a cyclic AMP signaling cascade in *Escherichia coli*. J Bacteriol 182:7060-6.

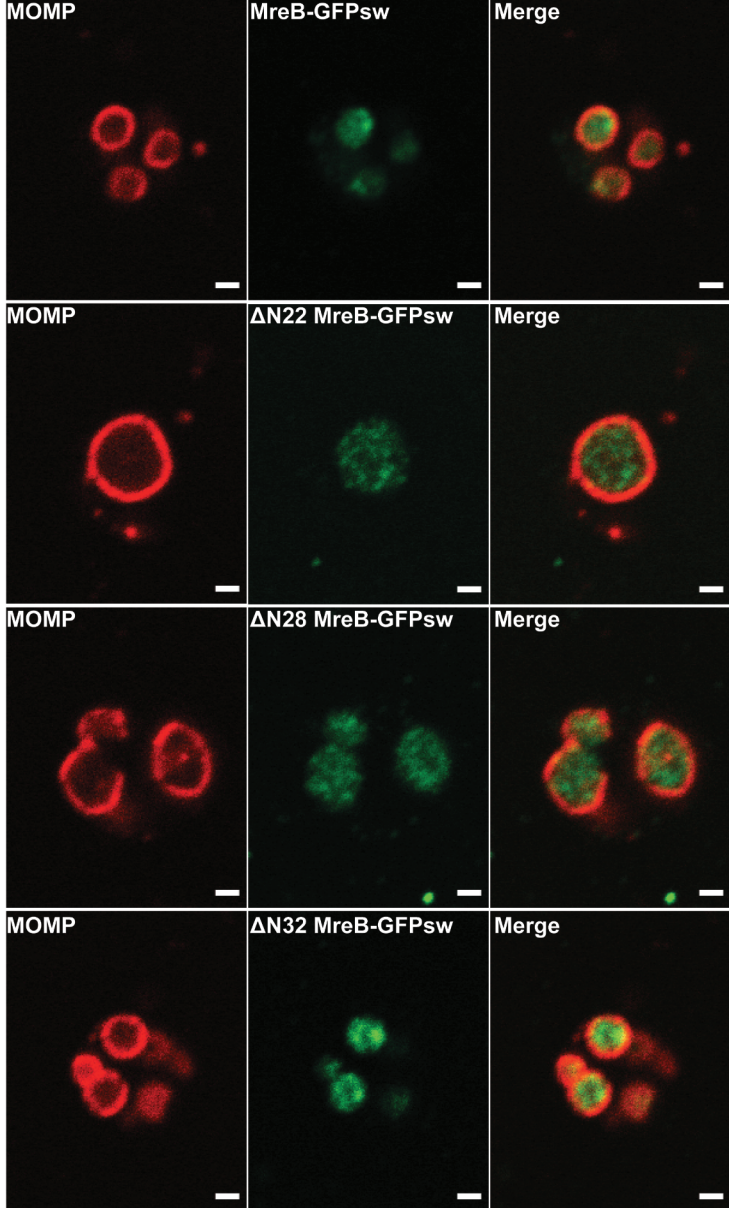

Supplemental Figure 1



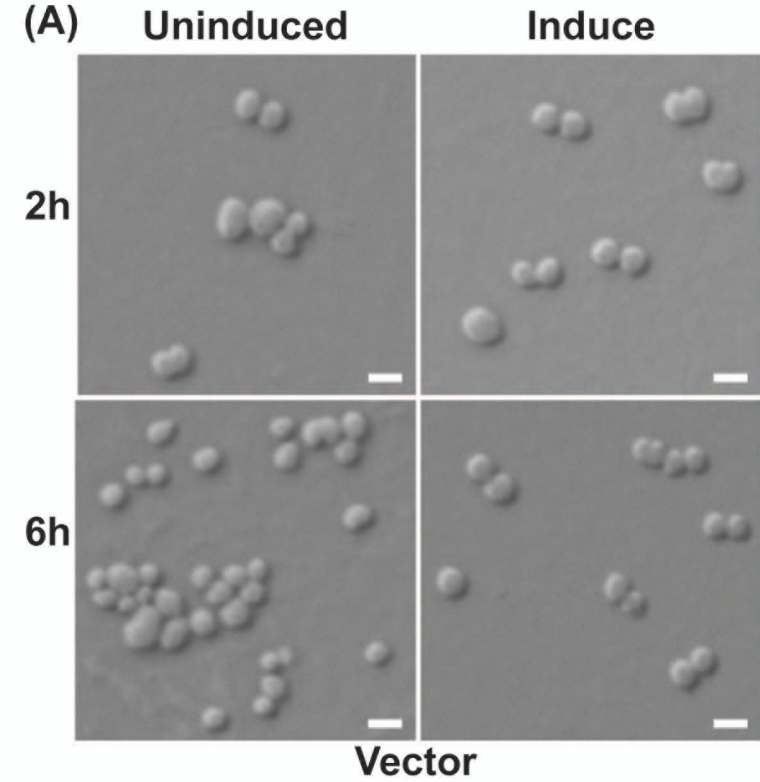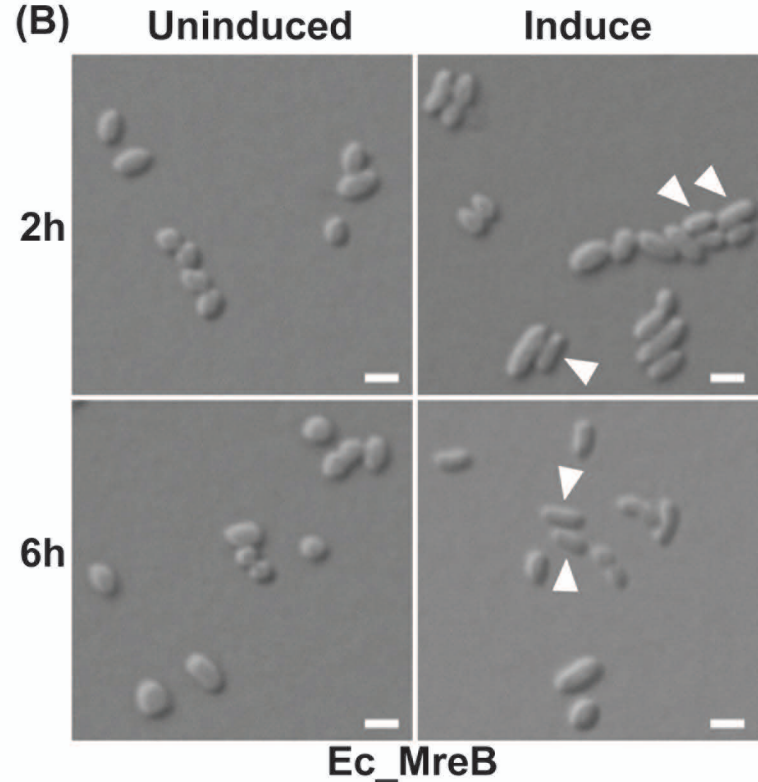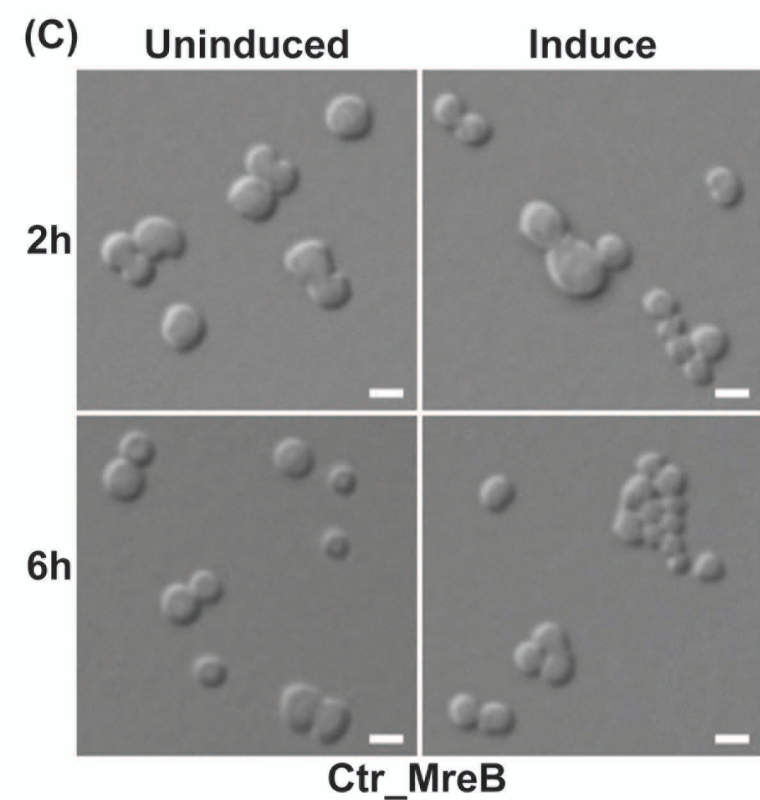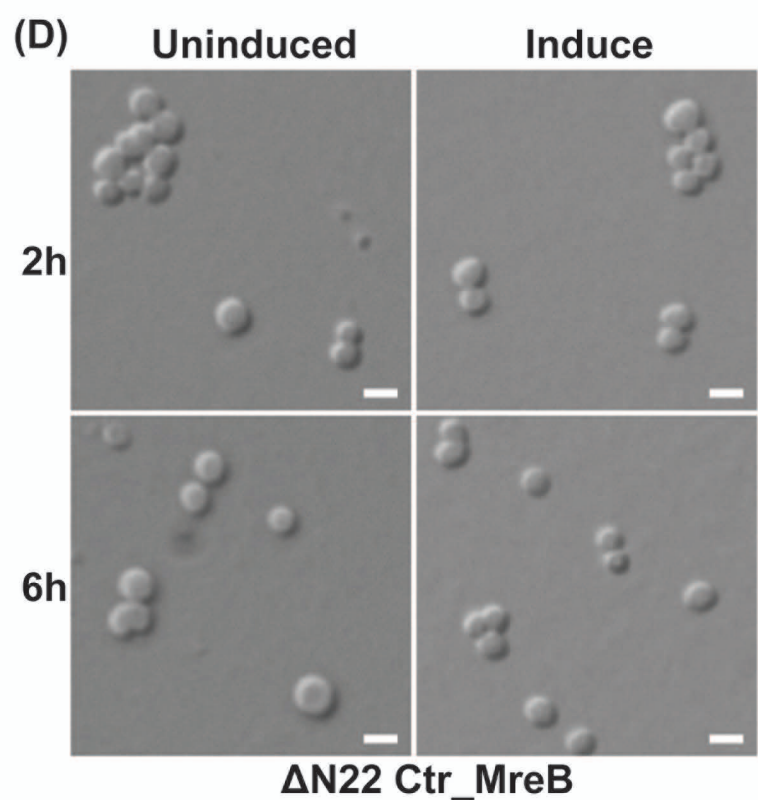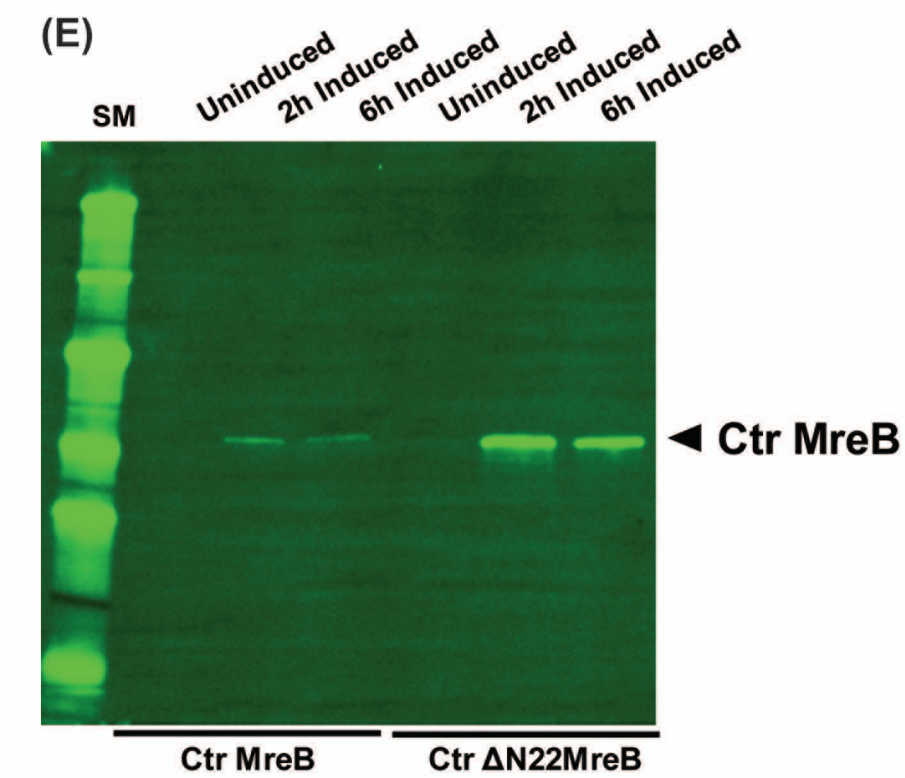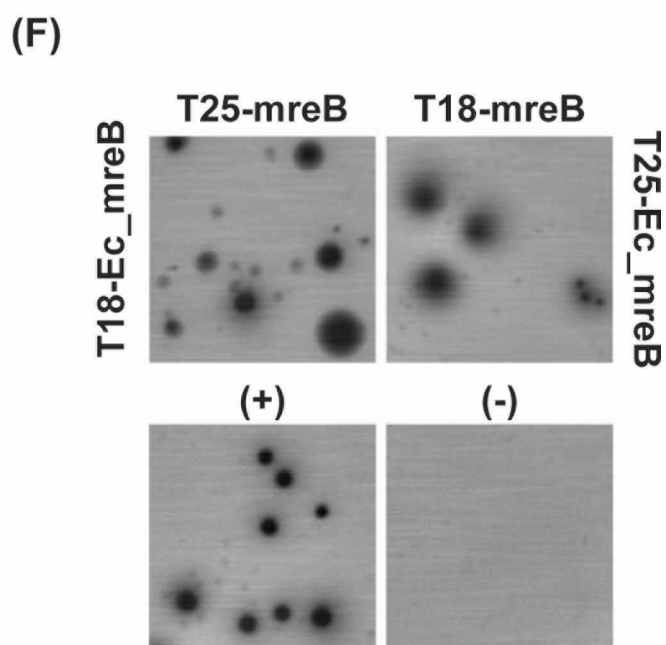

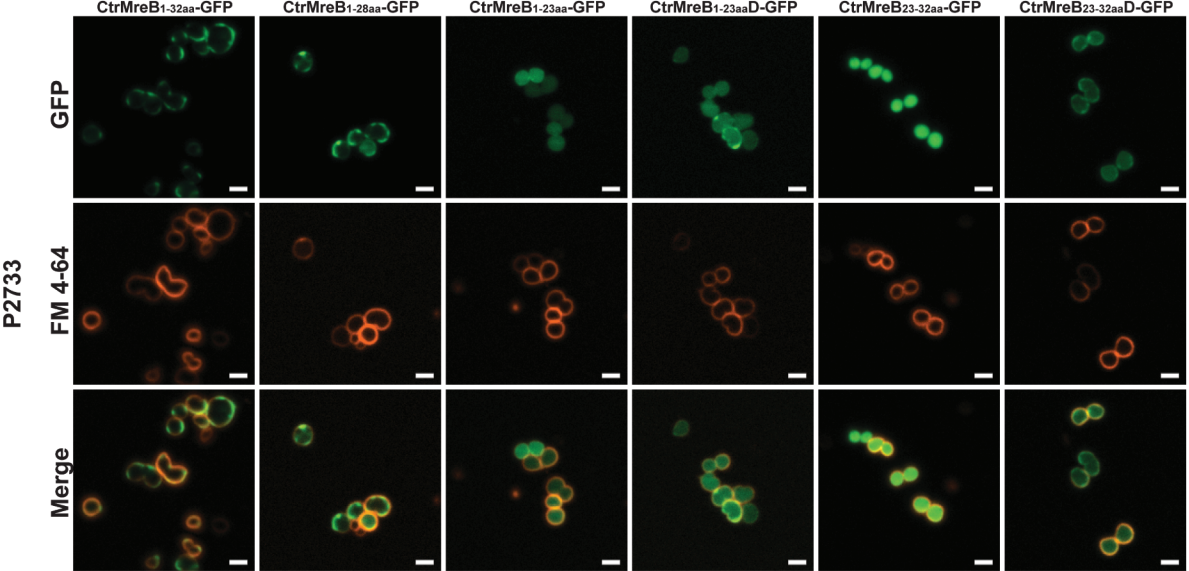

Supplemental Figure 4
